# Supplementary material
Source: Springer Nature journal article supplement (https://www.springermedizin.de/resource/supplementary/12963_2012_225_MOESM2_ESM.pdf/9572384)

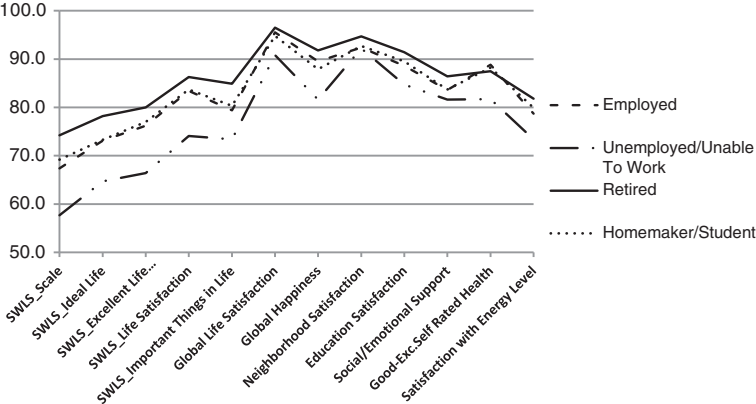

Supplement: MOESM2 [file 9572384]
